# Supplementary material for: The Effects of Different Purifying Methods on the Chemical Properties, in Vitro Anti-Tumor and Immunomodulatory Activities of Abrus cantoniensis Polysaccharide Fractions
Source: PubMed Central journal article supplement (PMC4848967; doi:10.3390/ijms17040511), 2016-04-06
Supplement: ijms-17-00511-s001.pdf [file ijms-17-00511-s001.pdf]

# Supplementary Materials: The Effects of Different Purifying Methods on the Chemical Properties, *in Vitro* Anti-Tumor and Immunomodulatory Activities of *Abrus cantoniensis* Polysaccharide Fractions

Shaowei Wu, Xiong Fu, Margaret A. Brennan, Charles S. Brennan and Chen Chun

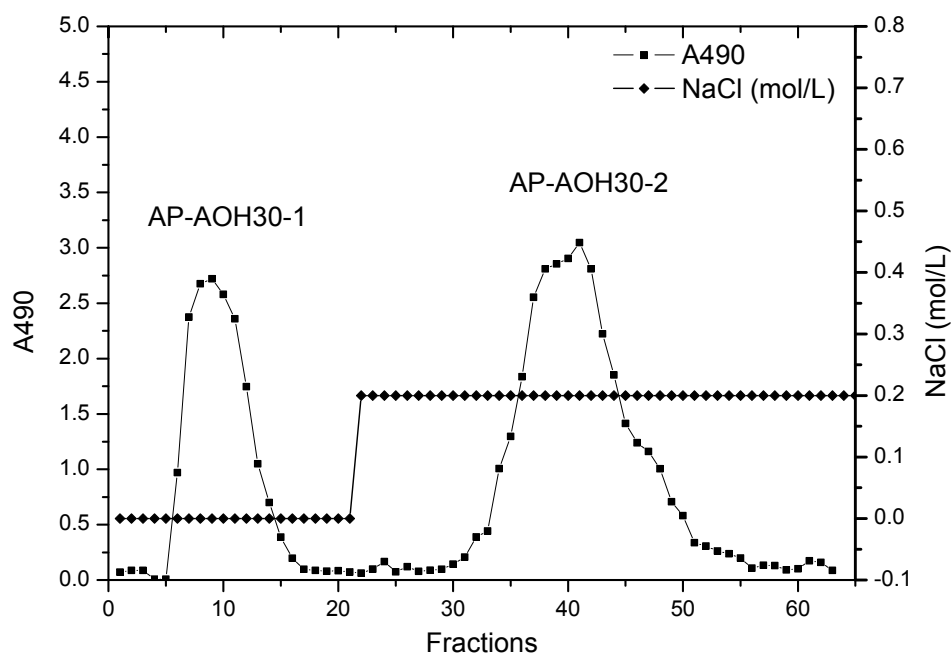

**Figure S1.** Elution curve of crude polysaccharide AP-AOH30 purified by DEAE-52 cellulose anion-exchange chromatography.

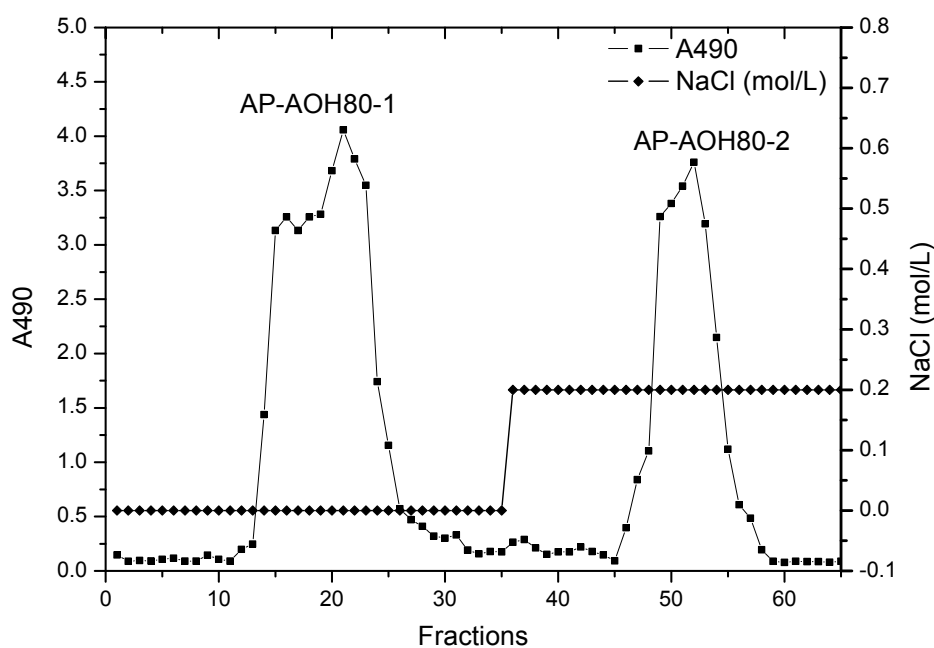

**Figure S2.** Elution curve of crude polysaccharide AP-AOH80 purified by DEAE-52 cellulose anion-exchange chromatography.

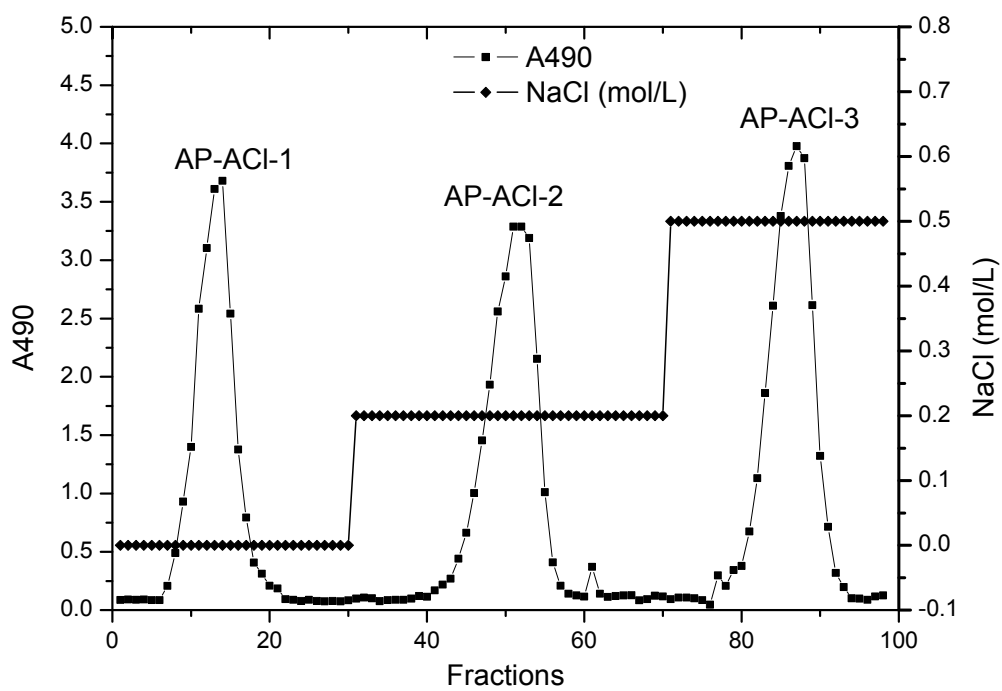

**Figure S3.** Elution curve of crude polysaccharide AP purified on the DEAE-sepharose fast flow column.
